# Supplementary material
Source: PubMed Central journal article supplement (PMC5564450)
Supplement: NIHMS863741-supplement-Supplemental_Tables.pdf [file NIHMS863741-supplement-Supplemental_Tables.pdf]

## Supplementary Tables

| <b>Supplementary Table 1</b> |                           |
|------------------------------|---------------------------|
| <b>Region of Interest</b>    | <b>Number of Vertices</b> |
| Accumbens                    | 930                       |
| Amygdala                     | 1368                      |
| Caudate                      | 2502                      |
| Hippocampus                  | 2502                      |
| Pallidum                     | 1254                      |
| Putamen                      | 2502                      |
| Thalamus                     | 2502                      |

| <b>Supplemental Table 2.</b>  |                 |           |          |          |            |
|-------------------------------|-----------------|-----------|----------|----------|------------|
| <b>Region of Interest</b>     | <b>Estimate</b> | <b>SE</b> | <b>T</b> | <b>P</b> | <b>FDR</b> |
| Left.Cerebellum.White.Matter  | -24.48          | 368.36    | -0.07    | 0.95     | 0.98       |
| Left.Cerebellum.Cortex        | 249.99          | 924.96    | 0.27     | 0.79     | 0.97       |
| Right.Cerebellum.White.Matter | 465.11          | 387.93    | 1.20     | 0.23     | 0.94       |
| Right.Cerebellum.Cortex       | -224.57         | 944.10    | -0.24    | 0.81     | 0.97       |
| Left.Thalamus.Proper          | -100.31         | 142.79    | -0.70    | 0.48     | 0.94       |
| Right.Thalamus.Proper         | -55.90          | 115.00    | -0.49    | 0.63     | 0.97       |
| Left.Caudate                  | 32.91           | 83.46     | 0.39     | 0.69     | 0.97       |
| Right.Caudate                 | 61.19           | 79.36     | 0.77     | 0.44     | 0.94       |
| Left.Putamen                  | 90.66           | 130.57    | 0.69     | 0.49     | 0.94       |
| Right.Putamen                 | 67.38           | 102.18    | 0.66     | 0.51     | 0.94       |
| Left.Pallidum                 | -15.08          | 44.03     | -0.34    | 0.73     | 0.97       |
| Right.Pallidum                | 8.92            | 40.63     | 0.22     | 0.83     | 0.97       |
| Left.Lateral.Ventricle        | -135.24         | 463.05    | -0.29    | 0.77     | 0.97       |
| X3rd.Ventricle                | 57.50           | 42.15     | 1.36     | 0.17     | 0.94       |
| X4th.Ventricle                | -120.71         | 91.15     | -1.32    | 0.19     | 0.94       |

|                         |         |        |       |      |      |
|-------------------------|---------|--------|-------|------|------|
| Right.Lateral.Ventricle | 816.83  | 719.42 | 1.14  | 0.26 | 0.94 |
| X5th.Ventricle          | -0.49   | 1.56   | -0.32 | 0.75 | 0.97 |
| Left.Accumbens.area     | 29.84   | 18.90  | 1.58  | 0.12 | 0.94 |
| Right.Accumbens.area    | 2.97    | 16.50  | 0.18  | 0.86 | 0.97 |
| Brain.Stem              | -592.63 | 372.66 | -1.59 | 0.11 | 0.94 |
| Left.Hippocampus        | -0.05   | 64.82  | 0.00  | 1.00 | 1.00 |
| Right.Hippocampus       | -25.66  | 72.85  | -0.35 | 0.73 | 0.97 |
| Left.Amygdala           | -13.57  | 36.11  | -0.38 | 0.71 | 0.97 |
| Right.Amygdala          | -14.54  | 36.97  | -0.39 | 0.69 | 0.97 |
| CC_Posterior            | 8.22    | 25.28  | 0.33  | 0.75 | 0.97 |
| CC_Anterior             | 4.87    | 28.25  | 0.17  | 0.86 | 0.97 |

**Supplemental Table 3**

| Y                              | ME            | Estimate | SE      | T     | P    | FDR  |
|--------------------------------|---------------|----------|---------|-------|------|------|
| <b>Left Lateral Ventricle</b>  | <b>TSI</b>    | -2134.67 | 1017.97 | -2.10 | 0.04 | 0.87 |
| <b>3rd Ventricle</b>           | <b>TSI</b>    | -177.81  | 51.19   | -3.47 | 0.00 | 0.12 |
| <b>Left Accumbens</b>          | <b>TSI</b>    | 77.02    | 24.90   | 3.09  | 0.00 | 0.15 |
| <b>Right Amygdala</b>          | <b>TSI</b>    | 131.20   | 43.06   | 3.05  | 0.00 | 0.15 |
| <b>Left Lateral Ventricle</b>  | <b>Mental</b> | 1686.82  | 680.77  | 2.48  | 0.01 | 0.47 |
| <b>Right Lateral Ventricle</b> | <b>Mental</b> | 1605.79  | 712.27  | 2.25  | 0.03 | 0.67 |

**Supplementary Table 4: Preliminary Results FDR corrected for shape analyses**

| Test                          | # Sig. Vertices | Mean T-Value | Effect Size | Mean Coefficient |
|-------------------------------|-----------------|--------------|-------------|------------------|
| ATTN_Binary_Left_Hippo_RD     | 2               | 4.581121     | 0.20574017  | 0.3646965        |
| TBI_MOI_Binary_Left_Accum_JD  | 355             | 2.854774     | 1.48850018  | 0.2002825        |
| TBI_MOI_Binary_Left_Accum_RD  | 138             | 3.009817     | 0.12580693  | 0.4901391        |
| TBI_MOI_Binary_Right_Accum_JD | 267             | 2.904324     | 0.40582721  | 0.1066334        |
| TBI_MOI_Binary_Right_Accum_RD | 61              | 3.170112     | 0.08704717  | 0.378449         |
| TSI_Right_Hippo_RD            | 5               | -4.675721    | 0.09957415  | -0.5760161       |
