# Supplementary material
Source: PubMed Central journal article supplement (PMC5564450)

(a)

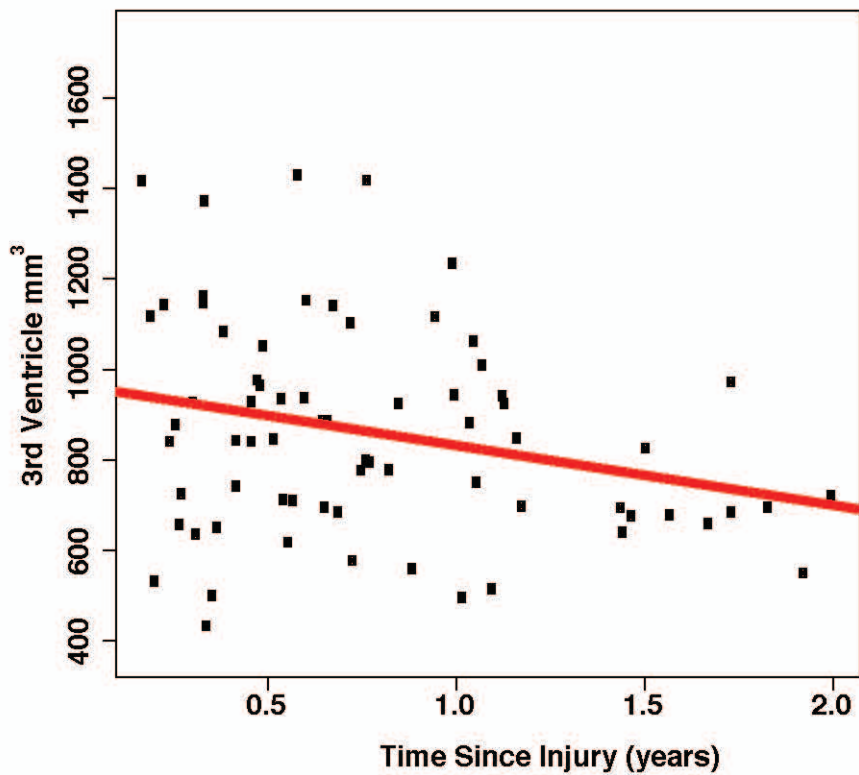

(b)

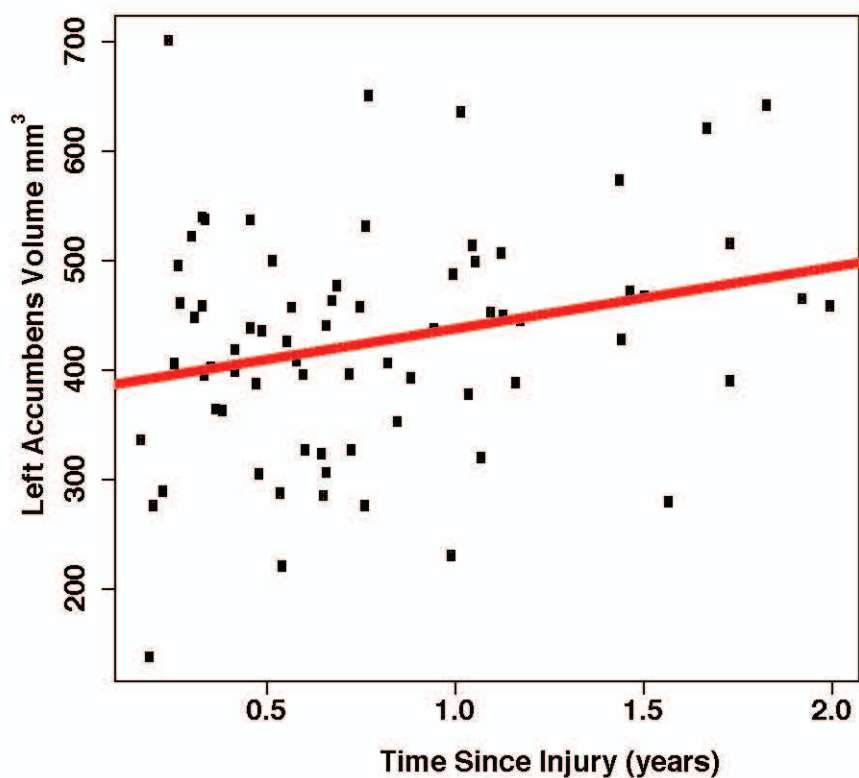

(c)

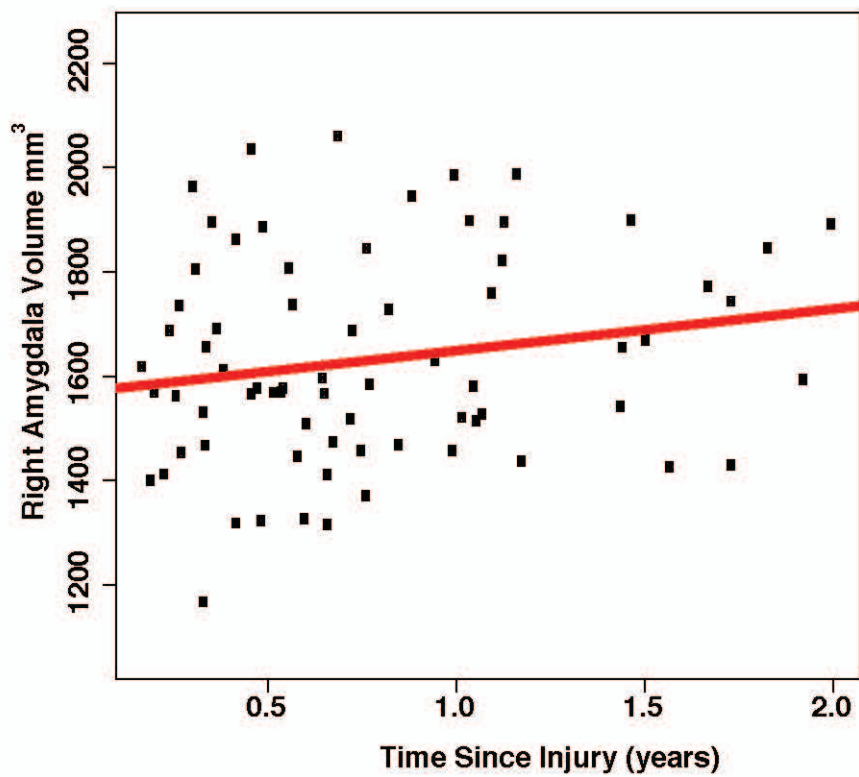

Supplement: NIHMS863741-supplement-Supplemental_Fig_1.pdf [file NIHMS863741-supplement-Supplemental_Fig_1.pdf]
